# Supplementary material
Source: Springer Nature journal article supplement (https://www.springermedizin.de/resource/supplementary/12936_2014_3278_MOESM3_ESM.pdf/9545484)
Supplement: MOESM3 [file 9545484]

### Additional file 3

‘Overview of included studies and reported outcomes.’

| Study                            | Country | Participants                              | Study design                                                                                           | RDT performance | RDT interpretation | RDT execution | Adherence to test results by CHWs | Morbidity / mortality | Acceptability by community | Uptake by community | Stock outs | CHW incentives | Cost – (effectiveness) |
|----------------------------------|---------|-------------------------------------------|--------------------------------------------------------------------------------------------------------|-----------------|--------------------|---------------|-----------------------------------|-----------------------|----------------------------|---------------------|------------|----------------|------------------------|
| Blanas [34] 2013                 | Senegal | All care-seeking patients                 | Pre- and post-training assessments of CHWs. Post-training assessment two months after training.        |                 |                    |               |                                   |                       | x                          |                     | x          |                |                        |
| Chanda [20] 2011(1) <sub>a</sub> | Zambia  | All care-seeking patients                 | One-year evaluation on the costs and effects of RDT-based CCMm <i>versus</i> health centre-based care. |                 |                    |               | x                                 |                       |                            |                     |            |                | x                      |
| Chanda [35] 2011(2) <sub>a</sub> | Zambia  | All care-seeking patients                 | Prospective 1.5-year evaluation of CHWs competence in RDT-based CCMm                                   |                 |                    |               | x                                 |                       | x                          |                     | x          |                |                        |
| Chinkhumba [27] 2010             | Malawi  | Patients ≥5 years with (history of) fever | Cross-sectional study on RDT use by CHWs                                                               | x               |                    |               | x                                 |                       |                            |                     |            |                |                        |
| Counihan [28] 2012               | Zambia  | All care-seeking patients                 | Prospective 1-year evaluation on RDT use by CHWs                                                       |                 | x                  | x             |                                   |                       |                            |                     | x          |                |                        |
| Elmardi [24] 2009                | Sudan   | All care-seeking patients                 | Pre- and post-intervention assessment (duration 9 months) on RDT-based CCMm.                           |                 |                    |               | x                                 | x                     | x                          | x                   | x          | x              |                        |
| Hamer [16] 2012 <sub>b</sub> &   | Zambia  | Patients 6 months-5 years with fever or   | Cluster randomized controlled trial. Intervention CHWs performed RDT-based CCMm and                    |                 |                    |               | x                                 |                       |                            | x                   |            | x              |                        |

|                                     |          |                                            |                                                                                                                                                                                        |   |   |  |   |   |   |   |  |  |   |  |  |  |  |  |  |   |
|-------------------------------------|----------|--------------------------------------------|----------------------------------------------------------------------------------------------------------------------------------------------------------------------------------------|---|---|--|---|---|---|---|--|--|---|--|--|--|--|--|--|---|
| Yeboah-Antwi [15] 2010 <sub>b</sub> |          | respiratory symptoms.                      | pneumonia treatment with amoxicillin. Control CHWs treated malaria presumptively and referred pneumonia patients.                                                                      |   |   |  |   |   |   |   |  |  |   |  |  |  |  |  |  |   |
| Harvey [30] 2008                    | Zambia   | Febrile patients.                          | Study on competence of CHWs in RDT performance directly after 3 hours' training.                                                                                                       |   | x |  | x |   |   |   |  |  |   |  |  |  |  |  |  |   |
| Hawkes [18] 2009                    | DRC      | Patients 0-14 years with fever             | One-week evaluation on RDT-based CCMm.                                                                                                                                                 |   | x |  | x |   |   |   |  |  |   |  |  |  |  |  |  | x |
| Ishengoma [25] 2011 <sub>c</sub>    | Tanzania | Patients with (history of) fever           | Longitudinal study (5 years) on RDT-based CCMm for patients ≥5 years and presumptive treatment for patients <5 years                                                                   | x |   |  |   | x |   |   |  |  |   |  |  |  |  |  |  |   |
| Lemma [37] 2010                     | Ethiopia | Care-seeking patients ≥1 year              | Two-year study. Year 1 all intervention CHWs presumptively treated malaria. Control areas had no CCMm. Year 2 half of intervention CHWs performed RDT-based CCMm.                      |   |   |  |   |   |   |   |  |  |   |  |  |  |  |  |  | x |
| Lemma [19] 2011                     | Ethiopia | Patients with (history of) fever           | Evaluation of three CCMm approaches. 1) Diagnosis of species-specific malaria + treatment; 2) Diagnosis of only <i>P. falciparum</i> + treatment; 3) Presumptive diagnosis + treatment | x |   |  |   |   |   |   |  |  |   |  |  |  |  |  |  | x |
| Mubi [21] 2011                      | Tanzania | Patients ≥3 months with (history of) fever | Randomized crossover trial. One group of CHWs performed RDT-based CCMm, other group treated malaria presumptively. Groups alternated every week.                                       | x | x |  |   | x | x | x |  |  |   |  |  |  |  |  |  |   |
| Mukanga [31] 2010                   | Uganda   | Caregivers of children <5 years.           | Survey among community members prior to implementation of RDT-based CCMm.                                                                                                              |   |   |  |   |   |   |   |  |  | x |  |  |  |  |  |  | x |
| Mukanga [29] 2011 <sub>d</sub>      | Uganda   | Patients <5 years with (history of) fever  | Study on competence of CHWs to use RDTs. Assessment 3 days-2 weeks after training. 13 consultations observed.                                                                          |   | x |  | x | x |   |   |  |  |   |  |  |  |  |  |  |   |
| Mukanga [33] 2012 <sub>d</sub>      | Uganda   | Caregivers of patients <5 years            | Cross-sectional study on caregivers' opinion on intervention CHWs performing RDT-based CCMm and treating pneumonia with amoxicillin.                                                   |   |   |  |   |   |   |   |  |  | x |  |  |  |  |  |  | x |



|       |  |                                                                             |                                                                  |   |   |   |    |   |   |   |   |   |   |  |
|-------|--|-----------------------------------------------------------------------------|------------------------------------------------------------------|---|---|---|----|---|---|---|---|---|---|--|
| 2011  |  | months and pregnant women in 2 <sup>nd</sup> and 3 <sup>rd</sup> trimester. | three months in an area with recently introduced RDT-based CCMm. |   |   |   |    |   |   |   |   |   |   |  |
| Total |  |                                                                             |                                                                  | 7 | 5 | 5 | 12 | 4 | 8 | 6 | 5 | 2 | 4 |  |

<sup>a-d</sup> Articles with the same letter are based on the same study.
